# Supplementary material for: Comparative Assessment of Antibiotic Residues Using Liquid Chromatography Coupled with Tandem Mass Spectrometry (LC-MS/MS) and a Rapid Screening Test in Raw Milk Collected from the North-Central Algerian Dairies
Source: MDPI journal article supplement (doi:10.3390/toxics10010019), 2022-01-05
Supplement: s1 [file s1]

# Supplementary Materials: Comparative Assessment of Antibiotic Residues Using Liquid Chromatography Coupled with Tandem Mass Spectrometry (LC-MS/MS) and a Rapid Screening Test in Raw Milk Collected from the North-Central Algerian Dairies

Fawzi Rostane Meklati, Anthi Panara, Ahmed Hadeif, Amel Meribai, Meriem H. Ben-Mahdi, Marilena E. Dasenaki and Nikolaos S. Thomaidis

**Table S1.** Validation data for  $\beta$ -lactams determination using LC-MS/MS.

| Compound      | Linearity*                          | % Recoveries** | %CV <sub>Reproducibility</sub><br>(n = 10) |
|---------------|-------------------------------------|----------------|--------------------------------------------|
| Cefaclor      | $y = 780.36x - 5938.2, R^2 = 0.994$ | 89.2           | 12                                         |
| Cefadroxil    | $y = 819.11x - 9585.6, R^2 = 0.98$  | 94.0           | 8.9                                        |
| Cefazolin     | $y = 2924.6x - 50031, R^2 = 0.990$  | 86.9           | 14                                         |
| Cefalexin     | $y = 6450.9x - 69248, R^2 = 0.993$  | 91.1           | 9.3                                        |
| Cefquinome    | $y = 9874.6x - 222158, R^2 = 0.98$  | 90.3           | 10                                         |
| Cefalonium    | $y = 2671.2x - 31728, R^2 = 0.990$  | 98.0           | 11                                         |
| Ceftiofur     | $y = 829.1x - 18653, R^2 = 0.98$    | 96.1           | 11                                         |
| Cefapirin     | $y = 14117x - 129611, R^2 = 0.995$  | 89.0           | 15                                         |
| Cefoperazone  | $y = 172.15x - 2423, R^2 = 0.992$   | 96.4           | 14                                         |
| Amoxicillin   | $y = 650.2x - 3322.4, R^2 = 0.992$  | 88.8           | 7.9                                        |
| Ampicillin    | $y = 8715.4x - 118331, R^2 = 0.995$ | 80.4           | 12                                         |
| Cloxacillin   | $y = 16202x - 355295, R^2 = 0.990$  | 86.7           | 16                                         |
| Oxacillin     | $y = 9022.3x - 197855, R^2 = 0.990$ | 95.5           | 14                                         |
| Dicloxacillin | $y = 10217x - 231962, R^2 = 0.98$   | 92.7           | 11                                         |
| Penicillin V  | $y = 13008x - 3441.2, R^2 = 0.992$  | 80.4           | 10                                         |
| Penicillin G  | $y = 777.81x - 10561, R^2 = 0.995$  | 97.3           | 10                                         |

\*std addition calibration curve : 15–400  $\mu\text{g/kg}$ . \*\*C spike for recovery calculation = 100  $\mu\text{g/kg}$ .

**Table S2.** Gradient elution programs for the determination of antibiotic residues.

| GRADIENT PROGRAMME<br>sulfonamides, tetracyclines, quinolones, macrolides and<br>trimethoprim |     | GRADIENT PROGRAMME<br>$\beta$ -lactams |     |
|-----------------------------------------------------------------------------------------------|-----|----------------------------------------|-----|
| Time (min)                                                                                    | % B | Time (min)                             | % B |
| 0                                                                                             | 10  | 0                                      | 5   |
| 10                                                                                            | 100 | 5                                      | 70  |
| 27                                                                                            | 100 | 9                                      | 100 |
|                                                                                               |     | 13                                     | 100 |

**Table S3.** MRM parameters, retention times and ion ratio for all compounds determined.

| Compound                    | Pseudo Molecular Ion | Product Ion 1 | Collision Energy (eV) | Product Ion 2 | Collision Energy (eV) | Tube Lens | RT (min) | Ion Ratio % |
|-----------------------------|----------------------|---------------|-----------------------|---------------|-----------------------|-----------|----------|-------------|
| <i>Quinolones</i>           |                      |               |                       |               |                       |           |          |             |
| Ciprofloxacin               | 332                  | <b>288</b>    | 18                    | 314           | 22                    | 85        | 7.7      | 41          |
| Danofloxacin                | 358                  | <b>96</b>     | 25                    | 314           | 20                    | 85        | 7.9      | 14          |
| Difloxacin                  | 400                  | <b>356</b>    | 20                    | 299           | 27                    | 85        | 8.0      | 75          |
| Enrofloxacin                | 360                  | <b>316</b>    | 25                    | 342           | 20                    | 85        | 7.7      | 91          |
| Flumequine                  | 262                  | <b>244</b>    | 20                    | 202           | 30                    | 85        | 12.0     | 37          |
| Marbofloxacin               | 363                  | <b>320</b>    | 15                    | 72            | 20                    | 85        | 7.2      | 51          |
| Norfloxacin                 | 320                  | <b>276</b>    | 16                    | 233           | 23                    | 91        | 7.6      | 72          |
| Ofloxacin                   | 362                  | <b>318</b>    | 19                    | 261           | 27                    | 120       | 7.4      | 93          |
| Oxolinic acid               | 262                  | <b>244</b>    | 18                    | 158           | 31                    | 79        | 10.7     | 2.5         |
| Sarafloxacin                | 386                  | <b>342</b>    | 18                    | 299           | 27                    | 85        | 8.1      | 95          |
| <i>Tetracyclines</i>        |                      |               |                       |               |                       |           |          |             |
| Chlortetracycline           | 479                  | <b>444</b>    | 20                    | 462           | 15                    | 90        | 9.4      | 58          |
| Doxycycline                 | 445                  | <b>427</b>    | 19                    | 267           | 35                    | 90        | 10.1     | 25          |
| Oxytetracycline             | 461                  | <b>426</b>    | 19                    | 443           | 12                    | 90        | 8.4      | 24          |
| Tetracycline                | 445                  | <b>410</b>    | 18                    | 426           | 12                    | 90        | 8.2      | 8.0         |
| <i>Cefalosporines</i>       |                      |               |                       |               |                       |           |          |             |
| Cefaclor                    | 368                  | <b>174</b>    | 14                    | 106           | 32                    | 81        | 7.7      | 58          |
| Cefadroxil                  | 364                  | <b>346</b>    | 19                    | 114           | 29                    | 97        | 6.6      | 30          |
| Cefazolin                   | 455                  | <b>156</b>    | 11                    | 323           | 17                    | 86        | 8.3      | 80          |
| Cefalexin                   | 348                  | <b>174</b>    | 6                     | 158           | 30                    | 113       | 7.6      | 72          |
| Cefquinome                  | 529                  | <b>134</b>    | 16                    | 396           | 11                    | 83        | 6.9      | 82          |
| Cefalonium                  | 459                  | <b>337</b>    | 9                     | 152           | 22                    | 83        | 7.7      | 50          |
| Ceftiofur                   | 524                  | <b>241</b>    | 25                    | 210           | 31                    | 97        | 9.4      | 65          |
| Cefapirin                   | 424                  | <b>292</b>    | 14                    | 152           | 23                    | 85        | 6.8      | 85          |
| Cefoperazone                | 646                  | <b>143</b>    | 32                    | 529           | 12                    | 90        | 8.4      | 80          |
| <i>Penicillins</i>          |                      |               |                       |               |                       |           |          |             |
| Amoxicillin                 | 366                  | <b>349</b>    | 8                     | 114           | 22                    | 68        | 6.6      | 67          |
| Ampicillin                  | 350                  | <b>106</b>    | 20                    | 160           | 12                    | 87        | 7.9      | 66          |
| Cloxacillin                 | 436                  | <b>114</b>    | 33                    | 276.7         | 13                    | 84        | 11.5     | 30          |
| Oxacillin                   | 402                  | <b>243</b>    | 13                    | 114           | 32                    | 65        | 12.0     | 35          |
| Dicloxacillin               | 470                  | <b>311</b>    | 15                    | 114           | 33                    | 101       | 12.0     | 36          |
| Penicillin V                | 351                  | <b>160</b>    | 11                    | 114           | 31                    | 64        | 11.3     | 60          |
| Penicillin G                | 335                  | <b>176</b>    | 15                    | 160           | 10                    | 87        | 10.7     | 40          |
| metabolite of Cloxacillin   | 410                  | <b>178</b>    | 32                    | 174           | 19                    | 80        | 11.0     | 60          |
| metabolite of Oxacillin     | 376                  | <b>174</b>    | 18                    | 144           | 31                    | 97        | 10.6     | 96          |
| metabolite of Penicillin V  | 325                  | <b>128</b>    | 26                    | 174           | 16                    | 86        | 10.5     | 79          |
| metabolite of Dicloxacillin | 444                  | <b>128</b>    | 33                    | 211           | 29                    | 115       | 11.4     | 40          |
| metabolite of Penicillin G  | 309                  | <b>174</b>    | 16                    | <b>128</b>    | 26                    | 93        | 9.9      | 79          |
| <i>Macrolides</i>           |                      |               |                       |               |                       |           |          |             |
| Azithromycin                | 750                  | <b>158</b>    | 29                    | 591           | 37                    | 127       | 8.4      | 48          |
| Clarithromycin              | 749                  | <b>158</b>    | 30                    | 590           | 20                    | 123       | 11.1     | 41          |
| Erythromycin                | 734                  | <b>158</b>    | 30                    | 576           | 20                    | 130       | 10.4     | 75          |
| Tiamullin                   | 494                  | <b>192</b>    | 21                    | 119           | 33                    | 101       | 10.2     | 28          |
| Tilmicosin                  | 869                  | <b>174</b>    | 42                    | 156           | 44                    | 165       | 8.9      | 38          |
| Tylosin                     | 917                  | <b>174</b>    | 36                    | 772           | 28                    | 148       | 10.3     | 36          |

| <i>Sulfonamides</i>      |     |            |    |     |    |    |      |     |
|--------------------------|-----|------------|----|-----|----|----|------|-----|
| Sulfaclozine             | 285 | <b>156</b> | 28 | 92  | 15 | 87 | 10.1 | 47  |
| Sulfachloropyridazine    | 285 | <b>156</b> | 28 | 92  | 14 | 87 | 9.0  | 28  |
| Sulfadimidine            | 279 | <b>186</b> | 17 | 124 | 26 | 87 | 8.8  | 34  |
| Sulfadimethoxine         | 311 | <b>156</b> | 17 | 108 | 29 | 87 | 10.1 | 43  |
| Sulfadoxine              | 311 | <b>156</b> | 17 | 108 | 27 | 87 | 9.2  | 32  |
| Sulfadiazine             | 251 | <b>156</b> | 15 | 92  | 27 | 87 | 7.4  | 55  |
| Sulfaguanidine           | 215 | <b>156</b> | 14 | 92  | 14 | 87 | 4.2  | 2.0 |
| Sulfisoxazole            | 268 | <b>156</b> | 13 | 92  | 27 | 87 | 8.2  | 65  |
| Sulfamonomethoxine       | 281 | <b>92</b>  | 13 | 156 | 29 | 87 | 8.6  | 90  |
| Sulfamethoxypyridazine   | 281 | <b>156</b> | 13 | 92  | 29 | 87 | 9.2  | 90  |
| Sulfamerazine            | 265 | <b>172</b> | 16 | 156 | 16 | 87 | 8.1  | 98  |
| Sulfamethizole           | 271 | <b>156</b> | 14 | 92  | 28 | 87 | 8.3  | 38  |
| Sulfamethoxazole         | 254 | <b>156</b> | 16 | 108 | 25 | 87 | 9.0  | 60  |
| Sulfamoxole              | 268 | <b>156</b> | 13 | 92  | 28 | 87 | 9.2  | 44  |
| Sulfapyridine            | 250 | <b>156</b> | 15 | 184 | 17 | 87 | 7.6  | 70  |
| Sulfaquinoxaline         | 301 | <b>156</b> | 18 | 92  | 30 | 87 | 10.4 | 38  |
| Sulfathiazole            | 256 | <b>156</b> | 15 | 92  | 26 | 87 | 7.4  | 39  |
| <i>Other antibiotics</i> |     |            |    |     |    |    |      |     |
| Trimethoprim             | 291 | <b>230</b> | 25 | 123 | 30 | 87 | 7.1  | 18  |

**Table S4.** Sensitivity and specificity of BetaStar® Combo test regarding to LC-MS/MS for  $\beta$ -lactams.

|                                                      |          |                      | LC-MS/MS positivity to<br>β-lactams |                           | Total         | Chi-Square<br>Tests Value | Sig.  |
|------------------------------------------------------|----------|----------------------|-------------------------------------|---------------------------|---------------|---------------------------|-------|
|                                                      |          |                      | Negative                            | Positive                  |               |                           |       |
| BetaStar®<br>Combo for<br>β-lactams<br>(all samples) | Negative | within<br>LC-MS/MS   | 20 <sub>a</sub><br>(74.1%)          | 1 <sub>b</sub><br>(4%)    | 21<br>(40.4%) | 26.475                    | 0.000 |
|                                                      | Positive | within<br>LC-MS/MS   | 7 <sub>a</sub><br>(25.9%)           | 24 <sub>b</sub><br>(96%)  | 31<br>(59.6%) |                           |       |
|                                                      | Total    |                      | 27                                  | 25                        | 52            |                           |       |
| Total BetaStar® Combo Sensitivity                    |          |                      |                                     |                           | 96%           |                           |       |
| Total BetaStar® Combo Specificity                    |          |                      |                                     |                           | 74.1%         |                           |       |
| BetaStar®<br>Combo for<br>β-lactams in<br>Company A  | Negative | within<br>LC-MS/MS   | 4 <sub>a</sub><br>(57.1%)           | 1 <sub>a</sub><br>(14.3%) | 5<br>(35.7%)  | 2.800                     | 0.094 |
|                                                      | Positive | within<br>LC-MS/MS   | 3 <sub>a</sub><br>(42.9%)           | 6 <sub>a</sub><br>(85.7%) | 9<br>(64.3%)  |                           |       |
|                                                      | Total    |                      | 7                                   | 7                         | 14            |                           |       |
| Total BetaStar® Combo Sensitivity                    |          |                      |                                     |                           | 85.7%         |                           |       |
| Total BetaStar® Combo Specificity                    |          |                      |                                     |                           | 57.1%         |                           |       |
| BetaStar®<br>Combo for<br>β-lactams in<br>Company B  | Negative | within<br>LC-MS/MS   | 8 <sub>a</sub><br>(100%)            | 0 <sub>b</sub><br>(0.0%)  | 8<br>(57.1%)  | 14.000                    | 0.000 |
|                                                      | Positive | % within<br>LC-MS/MS | 0 <sub>a</sub><br>(0.0%)            | 6 <sub>b</sub><br>(100%)  | 6<br>(42.9%)  |                           |       |
|                                                      | Total    |                      | 8                                   | 6                         | 14            |                           |       |
| Total BetaStar® Combo Sensitivity                    |          |                      |                                     |                           | 100%          |                           |       |
| Total BetaStar® Combo Specificity                    |          |                      |                                     |                           | 100%          |                           |       |
| BetaStar®<br>Combo for<br>β-Lactams in<br>Company C  | Negative | % within<br>LC-MS/MS | 8 <sub>a</sub><br>(66.7%)           | 0 <sub>b</sub><br>(0.0%)  | 8<br>(33.3%)  | 12.000                    | 0.001 |
|                                                      | Positive | % within<br>LC-MS/MS | 4 <sub>a</sub><br>(33.3%)           | 12 <sub>b</sub><br>(100%) | 16<br>(66.7%) |                           |       |
|                                                      | Total    |                      | 12                                  | 12                        | 24            |                           |       |
| Total BetaStar® Combo Sensitivity                    |          |                      |                                     |                           | 100%          |                           |       |
| Total BetaStar® Combo Specificity                    |          |                      |                                     |                           | 66.7%         |                           |       |

Each subscript letter denotes a subset of LC-MS/MS positivity categories whose column proportions do not differ significantly from each other at the 0.05 level using “z” test.

**Table S5.** Sensitivity and specificity of BetaStar® Combo test regarding to LC-MS/MS for tetracycline.

|                                                      |          |                    | LC-MS/MS positivity to<br>tetracycline |                           | Total         | Chi-Square<br>Tests Value | Sig.  |
|------------------------------------------------------|----------|--------------------|----------------------------------------|---------------------------|---------------|---------------------------|-------|
|                                                      |          |                    | Negative                               | Positive                  |               |                           |       |
| BetaStar® Combo for<br>tetracycline (all<br>samples) | Negative | within<br>LC-MS/MS | 44 <sub>a</sub><br>(89.8%)             | 1 <sub>b</sub><br>(33.3%) | 45 (86.5%)    | 7.736                     | 0.005 |
|                                                      | Positive | within<br>LC-MS/MS | 5 <sub>a</sub><br>(10.2%)              | 2 <sub>b</sub><br>(66.7%) | 7<br>(13.5%)  |                           |       |
| Total                                                |          |                    | 49                                     | 3                         | 52            |                           |       |
| Total BetaStar® Combo Sensitivity                    |          |                    |                                        |                           | 66.7%         |                           |       |
| Total BetaStar® Combo Specificity                    |          |                    |                                        |                           | 89.8%         |                           |       |
| BetaStar® Combo for<br>tetracycline in<br>Company A  | Negative | within<br>LC-MS/MS | 14<br>(100%)                           | 0<br>/                    | 14<br>(100%)  | Ns                        |       |
|                                                      | Positive | within<br>LC-MS/MS | 0                                      | 0                         | 0             |                           |       |
| Total                                                |          |                    | 14                                     | 0                         | 14            |                           |       |
| Total BetaStar® Combo Sensitivity                    |          |                    |                                        |                           |               |                           |       |
| Total BetaStar® Combo Specificity                    |          |                    |                                        |                           | 100%          |                           |       |
| BetaStar® Combo for<br>tetracycline in<br>Company B  | Negative | within<br>LC-MS/MS | 14<br>(100%)                           | 0<br>/                    | 14<br>(100%)  | Ns                        |       |
|                                                      | Positive | within<br>LC-MS/MS | 0                                      | 0                         | 0             |                           |       |
| Total                                                |          |                    | 14                                     | 0                         | 14            |                           |       |
| Total BetaStar® Combo Sensitivity                    |          |                    |                                        |                           | /             |                           |       |
| Total BetaStar® Combo Specificity                    |          |                    |                                        |                           | 100%          |                           |       |
| BetaStar® Combo for<br>tetracycline in<br>Company C  | Negative | within<br>LC-MS/MS | 16 <sub>a</sub><br>(76.2%)             | 1 <sub>a</sub><br>(33.3%) | 17<br>(70.8%) | 2.334                     | 0.127 |
|                                                      | Positive | within<br>LC-MS/MS | 5 <sub>a</sub><br>(23.8%)              | 2 <sub>a</sub><br>(66.7%) | 7<br>(29.2%)  |                           |       |
| Total                                                |          | Count              | 21                                     | 3                         | 24            |                           |       |
| Total BetaStar® Combo Sensitivity                    |          |                    |                                        |                           | 66.7%         |                           |       |
| Total BetaStar® Combo Specificity                    |          |                    |                                        |                           | 76.2%         |                           |       |

Each subscript letter denotes a subset of LC-MS/MS positivity categories whose column proportions do not differ significantly from each other at the 0.05 level using “z” test. Ns. No statistics are computed because BetaStar® Combo and LC-MS/MS for tetracycline are constants.

**Table S7.** Relationship between variables (FL, acidity, and samples origin) and the results of screening using BetaStar® Combo and LC-MS/MS.

| Variables                            | FL |                     |      | Acidity |                     |      | Companies |                     |       |
|--------------------------------------|----|---------------------|------|---------|---------------------|------|-----------|---------------------|-------|
|                                      | N  | Pearson Correlation | Sig. | N       | Pearson Correlation | Sig. | N         | Pearson Correlation | Sig.  |
| FL                                   | 52 | 1                   |      | 52      | 0.31*               | 0.03 | 52        | 0.26                | 0.07  |
| Acidity                              | 52 | 0.31*               | 0.03 | 52      | 1                   |      | 52        | 0.81**              | 0.00  |
| Companies                            | 52 | 0.26                | 0.06 | 52      | 0.81**              | 0.00 | 52        | 1                   |       |
| BetaStar® Combo for all samples      | 52 | 0.18                | 0.21 | 52      | 0.21                | 0.14 | 52        | 0.17                | 0.23  |
| BetaStar® Combo for $\beta$ -lactams | 52 | −0.20               | 0.16 | 52      | 0.06                | 0.67 | 52        | 0.05                | 0.73  |
| BetaStar® Combo for tetracycline     | 52 | 0.50**              | 0.00 | 52      | 0.45**              | 0.00 | 52        | 0.38**              | 0.005 |
| LC-MS/MS for all samples             | 52 | −0.13               | 0.37 | 52      | 0.05                | 0.71 | 52        | 0.05                | 0.75  |
| LC-MS/MS for $\beta$ -lactams        | 52 | −0.17               | 0.24 | 52      | 0.02                | 0.90 | 52        | 0.01                | 0.95  |
| LC-MS/MS for tetracycline            | 52 | 0.16                | 0.24 | 52      | 0.18                | 0.21 | 52        | 0.24                | 0.09  |
| LC-MS/MS for other antibiotics       | 52 | −0.03               | 0.85 | 52      | −0.22               | 0.12 | 52        | −0.17               | 0.24  |

\*. Correlation is significant at the 0.05 level. \*\*. Correlation is significant at the 0.01 level.

**Table S8.** Comparison of FL (g/100 mL) and titratable acidity (°D) means following the BetaStar® Combo test result.

| BetaStar® Combo                | Parameters | Results  | N  | Mean  | S.D  | t     | Sig.  |
|--------------------------------|------------|----------|----|-------|------|-------|-------|
| Screening for $\beta$ -lactams | FL         | Negative | 21 | 3.62  | 0.83 | 1.22  | 0.23  |
|                                |            | Positive | 31 | 3.39  | 0.33 |       |       |
|                                | Acidity    | Negative | 21 | 17.07 | 1.87 | −0.43 | 0.67  |
|                                |            | Positive | 31 | 17.32 | 2.17 |       |       |
| Screening for tetracycline     | FL         | Negative | 45 | 3.37  | 0.30 | −1.79 | 0.12  |
|                                |            | Positive | 7  | 4.21  | 1.25 |       |       |
|                                | Acidity    | Negative | 45 | 16.87 | 1.84 | −3.52 | 0.00* |
|                                |            | Positive | 7  | 19.50 | 1.80 |       |       |

**Table S9.** Variance of fat levels and acidity according to the accuracy of the rapid screening test for  $\beta$ -lactams and tetracyclines.

|                        | BetaStar® Combo for β-lactams |                        |                             |                         | BetaStar® Combo for tetracyclines |                        |                             |                         |                           |
|------------------------|-------------------------------|------------------------|-----------------------------|-------------------------|-----------------------------------|------------------------|-----------------------------|-------------------------|---------------------------|
|                        | Positivity groups             | False negative         | True negative               | False positive          | True positive                     | False negative         | True negative               | False positive          | True positive             |
|                        | Frequency                     | 1                      | 20                          | 7                       | 24                                | 1                      | 44                          | 5                       | 2                         |
|                        | Percent (%)                   | 1.92                   | 38.46                       | 13.46                   | 46.15                             | 1.92                   | 84.62                       | 9.62                    | 3.85                      |
| Fat Level (g/100 mL)   | Mean                          | 3.20                   | 3.64                        | 3.39                    | 3.39                              | 3.60                   | 3.36                        | 4.30                    | 4.00                      |
|                        | SD                            |                        | 0.84                        | 0.24                    | 0.35                              |                        | 0.30                        | 1.51                    | 0.14                      |
|                        | Min                           | 3.20                   | 3.00                        | 3.00                    | 2.70                              | 3.60                   | 2.80                        | 2.70                    | 3.90                      |
|                        | Max                           | 3.20                   | 6.20                        | 3.60                    | 4.20                              | 3.60                   | 4.20                        | 6.20                    | 4.10                      |
|                        | F                             |                        | 0.82                        |                         |                                   |                        | 5.59                        |                         |                           |
|                        | Sig.                          |                        | 0.49                        |                         |                                   |                        | 0.002                       |                         |                           |
|                        | FL < 3.5                      | 1 (3.45%) <sub>a</sub> | 11 (37.93%) <sub>a, b</sub> | 3 (10.34%) <sub>a</sub> | 14 (48.28%) <sub>a</sub>          | 0 (0%) <sub>a</sub>    | 27 (93.10%) <sub>a</sub>    | 2 (6.90%) <sub>a</sub>  | 0 (0%) <sub>a</sub>       |
|                        | FL 3.5–4                      | 0 (0%) <sub>a</sub>    | 5 (27.78%) <sub>b</sub>     | 4 (22.22%) <sub>a</sub> | 9 (50.00%) <sub>a</sub>           | 1 (5.56%) <sub>a</sub> | 15 (83.33%) <sub>a, b</sub> | 1 (5.56%) <sub>a</sub>  | 1 (5.56%) <sub>a, b</sub> |
|                        | FL > 4                        | 0 (0%) <sub>a</sub>    | 4 (80.00%) <sub>a</sub>     | 0 (0%) <sub>a</sub>     | 1 (20.00%) <sub>a</sub>           | 0 (0%) <sub>a</sub>    | 2 (40.00%) <sub>b</sub>     | 2 (40.00%) <sub>b</sub> | 1 (20.00%) <sub>b</sub>   |
|                        | χ2 Value                      |                        | 6.31                        |                         |                                   |                        | 13.29                       |                         |                           |
| Asymp. Sig.            |                               | 0.39                   |                             |                         |                                   | 0.04                   |                             |                         |                           |
| TitratableAcidity (D°) | Mean                          | 16.00                  | 17.13                       | 17.36                   | 17.31                             | 19.00                  | 16.82                       | 19.90                   | 18.50                     |
|                        | SD                            |                        | 1.90                        | 2.25                    | 2.19                              |                        | 1.84                        | 2.01                    | 0.71                      |
|                        | Min                           | 16.00                  | 14.00                       | 15.00                   | 13.00                             | 19.00                  | 13.00                       | 17.50                   | 18.00                     |
|                        | Max                           | 16.00                  | 20.00                       | 21.00                   | 23.00                             | 19.00                  | 21.00                       | 23.00                   | 19.00                     |
|                        | F                             |                        | 0.15                        |                         |                                   |                        | 4.89                        |                         |                           |
|                        | Sig.                          |                        | 0.93                        |                         |                                   |                        | 0.005                       |                         |                           |
|                        | Acidity < 14                  | 0 (0%) <sub>a</sub>    | 0 (0%) <sub>a</sub>         | 0 (0%) <sub>a</sub>     | 1 (100%) <sub>a</sub>             | 0 (0%) <sub>a</sub>    | 1 (100%) <sub>a, b</sub>    | 0 (0%) <sub>a, b</sub>  | 0 (0%) <sub>a</sub>       |
|                        | Acidity 14–18                 | 1 (2.78%) <sub>a</sub> | 15 (41.67%) <sub>a</sub>    | 4 (11.11%) <sub>a</sub> | 16 (44.44%) <sub>a</sub>          | 0 (0%) <sub>a</sub>    | 34 (94.44%) <sub>b</sub>    | 1 (2.78%) <sub>b</sub>  | 1 (2.78%) <sub>a</sub>    |
|                        | Acidity > 18                  | 0 (0%) <sub>a</sub>    | 5 (33.33%) <sub>a</sub>     | 3 (20.00%) <sub>a</sub> | 7 (46.67%) <sub>a</sub>           | 1 (6.67%) <sub>a</sub> | 9 (60.00%) <sub>a</sub>     | 4 (26.67%) <sub>a</sub> | 1 (6.67%) <sub>a</sub>    |
|                        | χ2Value                       |                        | 2.44                        |                         |                                   |                        | 10.82                       |                         |                           |
| Asymp. Sig.            |                               | 0.88                   |                             |                         |                                   | 0.09                   |                             |                         |                           |

Each subscript letter denotes a subset of parameters class categories whose column proportions do not differ significantly from each other at the 0.05 level using z test.
